# Supplementary material for: Suppressed autophagic response underlies augmentation of renal ischemia/reperfusion injury by type 2 diabetes
Source: PubMed Central journal article supplement (PMC5509657; doi:10.1038/s41598-017-05667-5), 2017-07-13
Supplement: 41598_2017_5667_MOESM1_ESM.pdf [file 41598_2017_5667_MOESM1_ESM.pdf]

# Supplementary Information

**Suppressed autophagic response underlies augmentation of renal ischemia/reperfusion injury by type 2 diabetes.**

Shingo Muratsubaki, Atsushi Kuno<sup>†</sup>, Masaya Tanno, Takayuki Miki, Toshiyuki Yano, Hirohito Sugawara, Satoru Shibata, Koki Abe, Satoko Ishikawa, Kouhei Ohno, Yukishige Kimura, Yuki Tatekoshi, Kei Nakata, Wataru Ohwada, Masashi Mizuno, Tetsuji Miura

Department of Cardiovascular, Renal and Metabolic Medicine, <sup>†</sup>Department of Pharmacology, Sapporo Medical University School of Medicine, Sapporo, Japan.

**Supplementary Table 1.** Hemodynamic parameters 24 h after renal ischemia/reperfusion

|                                 | LETO<br>(N=12) | OLETF<br>(N=12) | LETO+CQ<br>(N=8) | OLETF+CQ<br>(N=10)  |
|---------------------------------|----------------|-----------------|------------------|---------------------|
| Heart rate (bpm)                | 349±4          | 277±12*         | 307±10*          | 260±9 <sup>#</sup>  |
| Systolic blood pressure (mmHg)  | 104±3          | 104±2           | 108±3            | 117±3 <sup>#†</sup> |
| Diastolic blood pressure (mmHg) | 72±4           | 70±3            | 66±2             | 79±2 <sup>#†</sup>  |

Values are means ± SEM. \*p<0.05 vs. LETO, <sup>#</sup>P<0.05 vs. LETO+CQ, †P<0.05 vs. OLETF

**Supplementary Table 2.** Effect of rapamycin on metabolic parameters after renal ischemia/reperfusion.

|                           | OLETF+ Vehicle<br>(N=7) | OLETF+ Rapamycin<br>(N=7) |
|---------------------------|-------------------------|---------------------------|
| Body weight (g)           | 641±12                  | 650±16                    |
| Blood glucose (mg/dl)     | 231±21                  | 234±20                    |
| Glycoalbumin (%)          | 17.2±3.0                | 14.0±1.3                  |
| Total cholesterol (mg/dl) | 144±9                   | 155±15                    |
| Triglyceride (mg/dl)      | 147.6±48.5              | 148.0±33.0                |

Values are means ± SEM.

**Supplementary Table 3.** Effects of rapamycin on hemodynamic parameters after renal ischemia/reperfusion

|                                 | OLETF+ Vehicle<br>(N=7) | OLETF+ Rapamycin<br>(N=7) |
|---------------------------------|-------------------------|---------------------------|
| Heart rate (bpm)                | 306±14                  | 285±10                    |
| Systolic blood pressure (mmHg)  | 122±4                   | 121±3                     |
| Diastolic blood pressure (mmHg) | 85±7                    | 78±3                      |

Values are means ± SEM.

**Supplementary Table 4.** Antibodies used in the present study

| Antibodies                                             | Source         | Cat. No. | dilution |
|--------------------------------------------------------|----------------|----------|----------|
| Guinea pig anti-polyclonal p62                         | Progen         | GP62-C   | 1:1000   |
| Rabbit monoclonal anti-LC3A/B                          | Cell Signaling | #12741   | 1:1000   |
| Rabbit polyclonal anti-phospho-Thr389-p70S6K           | Cell Signaling | #9205    | 1:1000   |
| Rabbit polyclonal anti-p70S6K                          | Cell Signaling | #9202    | 1:1000   |
| Rabbit polyclonal anti-phospho-Ser235/236-S6           | Cell Signaling | #2211    | 1:1000   |
| Rabbit polyclonal anti-S6                              | Cell Signaling | #2217    | 1:1000   |
| Rabbit polyclonal anti-phospho-Ser473-Akt              | Cell Signaling | #9271    | 1:1000   |
| Rabbit polyclonal anti-Akt                             | Cell Signaling | #9272    | 1:1000   |
| Rabbit monoclonal anti-phospho-Thr172<br>AMPK $\alpha$ | Cell Signaling | #2535    | 1:1000   |
| Rabbit polyclonal anti-AMPK $\alpha$                   | Cell Signaling | #2532    | 1:1000   |
| Rabbit monoclonal anti-phospho-Ser555-ULK1             | Cell Signaling | #5869    | 1:1000   |
| Rabbit monoclonal anti-ULK1                            | Abcam          | ab128859 | 1:1000   |
| Rabbit monoclonal anti-Beclin-1                        | Cell Signaling | #3495    | 1:1000   |
| Mouse monoclonal anti-p53 (1C12)                       | Cell Signaling | #2524    | 1:1000   |
| Mouse monoclonal anti-SIRT1 (19A7AB4)                  | Abcam          | ab110304 | 1:2000   |
| Mouse monoclonal anti- $\beta$ -actin                  | Sigma-Aldrich  | A5316    | 1:10000  |

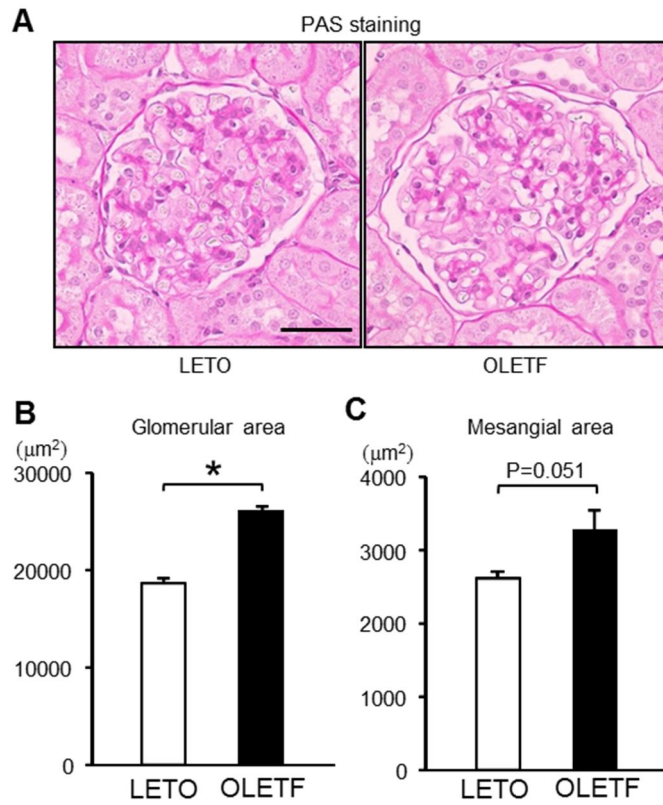

**Supplementary Figure 1.** Sizes of glomerular areas and mesangial areas in LETO and OLETF. Representative glomeruli stained with PAS (A) and group mean data for glomerular area size (B) and for mesangial area size (C). Fifteen glomeruli were randomly selected in each kidney sample and sizes of glomerular and mesangial areas were determined by Nikon NIS-elements software. N = 5 in each group. \*P<0.05. Scale bar, 50  $\mu\text{m}$ .

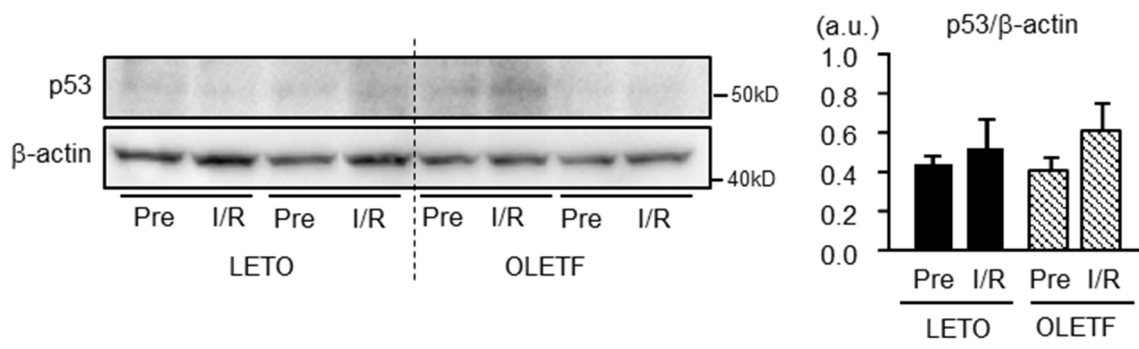

**Supplementary Figure 2.** Protein levels of p53 in LETO and OLETF before and after renal ischemia/reperfusion. Left panel: Representative immunoblots for p53 before ischemia (Pre) and 24 h after ischemia/reperfusion (I/R). Right panel: group mean data for p53 protein level normalized by  $\beta$ -actin level (n = 8 in each treatment group).
